# Supplementary material for: Taxane chemotherapy induces stromal injury that leads to breast cancer dormancy escape
Source: PubMed Central journal article supplement (PMC10497165; doi:10.1371/journal.pbio.3002275), 2023-09-12

Raw blot images for supplementary figure S2E

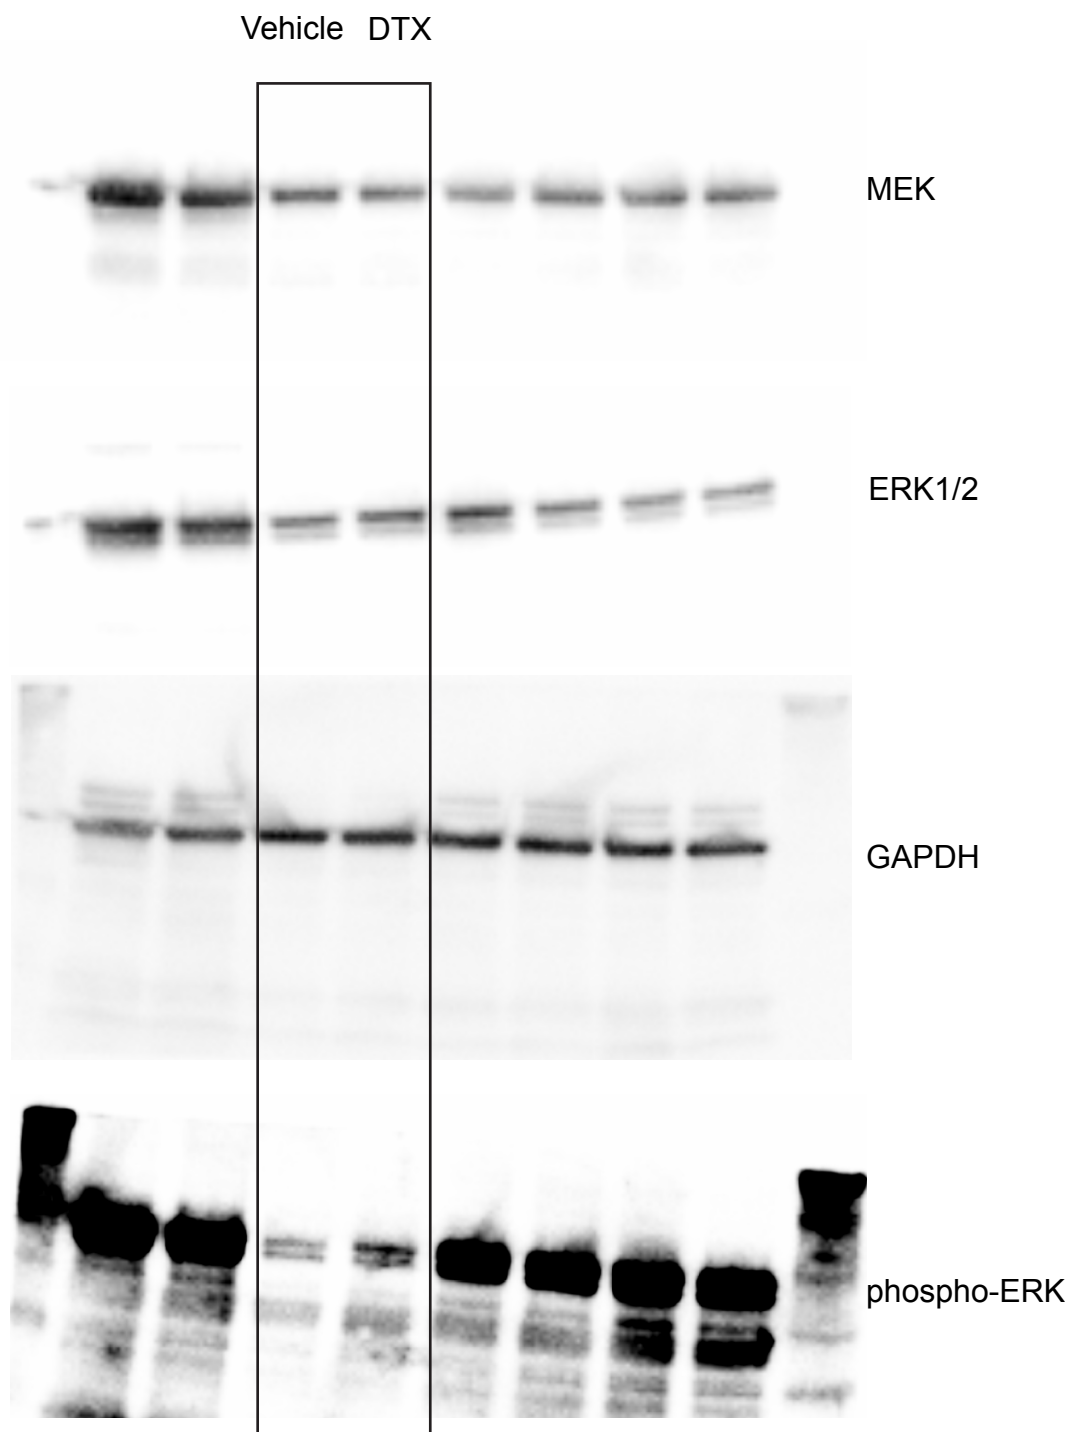

Supplement: pbio.3002275.s017.pdf [file pbio.3002275.s017.pdf]
